# Supplementary material for: Isolation and Functional Examination of the Long Non-Coding RNA Redrum
Source: PubMed Central journal article supplement — Mol Cells. 2017 Dec 12;41(2):134–9. doi: 10.14348/molcells.2018.2246 (PMC5824023; doi:10.14348/molcells.2018.2246), 2017-12-12
Supplement: molce-41-2-134-supple.pdf [file molce-41-2-134-supple.pdf]

**Supplementary Figure S1.** Nucleotide sequences from three exons of mouse *Redrum* are aligned with those of presumptive orthologues of other rodent species. Note that highest level of homology is seen in the 3<sup>rd</sup> exon.

**1 Exon**

Percent Identical: Naked\_mole Rat 31%, Squirrel 39%

```
Mouse      A G A C T G C T T T C T C A A G T G G C T T A G T G T C T C C A C T C A G G G G T G G T G G A G C T C T T C T T C T C A
Rat        -----
Kangaroo_Rat -----
Naked-mole -----
Guinea-pig -----
Squirrel   -----T C T A T T T T A T T
Rabbit     -----
```

```
Mouse      C T G C T T C T T C T C A T T T T T T C A T G C T C T G G C C T A A T G T C T T G G T G G T A T T A G C C T A G C A C
Rat        -----
Kangaroo_Rat -----
Naked-mole -----
Guinea-pig -----
Squirrel   C T G C T T T C T T C C A T -----
Rabbit     -----
```

```
Mouse      A A C T T C A G T T G C A C T G C A G G T T C T T C A T A A A A T T G A A A C A C T G T T T C - C A G A T T T G G A T T
Rat        -----
Kangaroo_Rat -----
Naked-mole -----A T A T G G T T G A A A A A T T G T T T C A T A G G T T T T C A T T
Guinea-pig -----
Squirrel   -----T T C C C C C A T C C A T C C C C
Rabbit     -----
```

```
Mouse      T T C T T C T G C T C T G C C A T G G G T T G T T C A C A T T C T C T C A A G G T T G T T A C T A C T G T T T T A C C T
Rat        -----
Kangaroo_Rat -----
Naked-mole C A T T T G T A T T T C -----T T C T C T T A A G T A C A T T T T G A A G T T T T G G T C T
Guinea-pig -----
Squirrel   T C C C T G T A T T T C -----T T C T T T A A A G A A C A C T T T G A A T T C T T T G A C C
Rabbit     -----
```

```
Mouse      T T T T C T A C T T G A T A A T T T T G G -----A A A C C G
Rat        -----
Kangaroo_Rat -----
Naked-mole T T T T T C T T T G T C C T T T T T C T -----A A C T A -
Guinea-pig -----
Squirrel   A T A T T T T C T T T C T T C T T T T T T T T T G T C T C T A A G T G A T A C T T
Rabbit     -----
```

## 2 Exon

Percent identical: Rat 87%, Kangaroo\_Rat 57%, Naked\_mole Rat 59%, Guinea-pig 55%, Squirrel 58%, Rabbit 28%

```
Mouse      GCTTGATGGAGGCCCTACAGTGA  
Rat        GCTTGA-GGGAGACCTATAGTGA  
Kangaroo_Rat TCGTGA-CTGAGGCTTACAAGCGGAGTCCATCAGCCGAGGCTTAG---CTCTCTGTCTGG  
Naked_mole  TTATGA-TTGAGACTTACAAACTGGGCCTGTTAGCCCAATCTCAGAATGTCTGTAACAGG  
Guinea-pig  TCATGA-----GACATGAGAGCCATTAGCCCACTCACAGAACGTCTGTGGAAGG  
Squirrel    TCATGA-CTGAAACTTACAAACTGAGACCATTTGCC-AATCTCAGAATATCTACAGAAGA  
Rabbit      -----
```

```
Mouse      ACCCTGAAAGAATGACCTGGCCGGAAGATTGTCCCATCCTGCATGAG  
Rat        ACCCTGAAAAAATGACCTTGCCAGAAGCTTGTACCATCTTTCATGAG  
Kangaroo_Rat CCTCCAGGAGGGATGTCTTGTGTCAGAAGCTTGGGCTGTTCTGCACGGG  
Naked_mole  AGCCTCAGAGGATGACCTCCTTGAAGTGGGAGTCATTCTGCATGAG  
Guinea-pig  AACCTCAGAGGAGGACCTCTTAGGAAGTATGGGTTCATTCTGCACGAG  
Squirrel    ATCCTAAGAGGATGACCTCACTAGAAGCTTGGTGC-TTCTACATGAA  
Rabbit      -----AGGGGATGGGCCGCGGGAAGCGGGGCTCATTCTGCCCAAG
```

### 3 Exon

Percent identical: Rat 87%, Kangaroo\_Rat 67%, Naked\_mole Rat 73%, Guinea-pig 72%, Squirrel 76%, Rabbit 58%

Mouse GAGGGAAGAATGAGCCTCACTCTACACCCAGAATGCCAACTACATTTTCATCCAGTCCTC  
Rat AAGGGAAGAATGAGCTTCATTCTCTAACCAGAATGCCAGCCACATTTCCATTTCAGTCCTG  
Kangaroo\_Rat AGGAAAAGAGTGCATCTGACTCTGCATCTGGGACATTGCCAATGCTTTTGCCTAACCCCA  
Naked\_mole AGGACAACACTGCACCTAACTACACACCCAGCATGTGGGCAATGTTTTTATCCAATCCTA  
Guinea-pig AGGAGGAGACAGCACCTAACCATATACCCAGCATGTGAGCAACGATTCTATCCAGTCCTA  
Squirrel AGGAGAAGAATGAATCTAACTATAACCCAGGATGTGAGCAATGTTTTTATCCAATGCCA  
Rabbit AGGAGGAGGATGGATTTGAGTAGACACTCAG-----

Mouse AAAAAATATCATGCGCACCCAGATTCTCCTGGTCAGACCAACACTGTGGAAACCCACTGG  
Rat AAAGGATATCATGTGTACCCAGATTCTC-----CTGTAGGAACCCAGTCG  
Kangaroo\_Rat GTCCAAGCTCAGGCTGACCAAGGTTCTCTTGATCAGA-TACTCCTGTGGAAACCAAATTT  
Naked\_mole GAGTAAACTCATGTTTACCCAGATTGTCTTGGTCATA-TGCGGCTGTAGAAACCAAGTTTA  
Guinea-pig GAATAAACTCATGTTTACCCAGATTGTCTTGGTCATA-CGAGGCTTTGGGAATCCAATCA  
Squirrel GAATAAACTCATGTGTACGCAGATTCTCCTGGTTGGA-GGTGGCTATG-----  
Rabbit -----

Mouse ATGCATTTCAGAGGGATCACTGATAATGAAGAATGAGATGCCGTCATCCATCTGTAGGAAG  
Rat ATGTCTTCAGAAGTATCCCTGATAATGAAGAATGAAATGCAGTCA----TCCACAGCAAG  
Kangaroo\_Rat GGTCATTTAGGGGCACTACTAGTAATACAAAATGTGAAGCCGTCACCAGTCCACAGGAAA  
Naked\_mole ATACATTCTGAGTTAGCATTAATAATGAAATATGACATACATTTCATAAGTCCACAGGAAG  
Guinea-pig ATATATTCTGAGGTATCATTAAATAATGAAATATGAAATACATTTCACAAGTCCACAGGAAG  
Squirrel ATGTTTTCTGAGGGAGCACTAATAATGAAGTATGAAACACCTCCATGAGTCCACAGGATG  
Rabbit -----

Mouse ATGCTGCGTGTGCCATAGAACCCAAAAGTCATCTATTGCAAGAGA-GAATCGATTCTCCC  
Rat ATGCCTTTTGAGTCATACAACCCAAAAGTAATCTATTGCA--AGA-GATTCAACCCTCCC  
Kangaroo\_Rat ATATTATCTATCTAATGCAATC-----TGCCTCA--AAGAATACAAAGTCTTAC  
Naked\_mole ATATTTTCTATCACATTCTACCAACAAGTATTTTTTCCCA--GAG-ATACCAAGTCTTCC  
Guinea-pig ATATTTTCTGTATAGGCCACCAACAAGCATTTTTTTTCCA--AAA-ATACCAAGTGTTC  
Squirrel ATACTTTCTATCACATACACCTACAAGGTTTTTATTTTTTCA--AAGAATACGAAGTTTTAC  
Rabbit -----

Mouse AAGTAAACGGGGCCCTATTAGTTTTAAAACTAATGCAGCACAGAGAGAAATCAGGTTCCCT  
Rat CGCTAAGCAGGGCCCTGTTTCGTTTTAAAACTGACACAATACA-GAGACAATCAGGTTCCCT  
Kangaroo\_Rat AAAGGAA--GGGTGCCATATA---CAAACAAGTGTACGTA-GGATGAGTCCAATCCCC  
Naked\_mole AAAGGAATAGAGTGTATTATA----AAAAAATATTTATACTCGTAAAGAAATTGGGTCCCT  
Guinea-pig AAAGGAATGGGGTGTATTATAC---AAAAAATATTAATACTTGTAAGAAATTGGGTCCCT  
Squirrel AAACCCAAAGGATGTTATCAT--AAAAAATACTGATACATGTGGAGGAGTCCAGGTTCCCT  
Rabbit -----

Mouse CAGACAATGTTGATTCTGTTTCCTTTTGAACCATTAACAGCCTCACTTAAAGCCATGTAT  
Rat CAGACAACACTGATTCCATTTCCCTTTTGAACCATTACCAGCTTCACTTAAAGCCATGTAT  
Kangaroo\_Rat ACAAAAAGGCTGATTCTG-TTGCTTTAAAAATATTAATTGCCTGA-TGATCGTCATATCT

Naked\_mole GTGACAATGTTGA--CCGCTGCTTTCTAAAATATTAATTACCTTATTTATAGCTATATAT  
Guinea-pig ATGACAATGCTGACTCTG-CTGCTTCTAAAATATCTGTGACCATATGTATATATAT----  
Squirrel GCAACAAGACTGAATCTGCTGCTTTTTTAAAATACTAATTATCTCACTTATAGCCATATAT  
Rabbit -----

Mouse TGAAAGCTGCGACTTAACGTTAACCACAGTTTCTAATGCATTAAACAAATGGCAAGGATG  
Rat TGAAAGCTGTTGACTATCTTTAACCA--GTTTCTAATAAACTAAACAAATGTCGGGGATG  
Kangaroo\_Rat AAAAAGGT-CTATTTTTGTCTAACCATTGTTTGAAAAGGAGAGAGAAATAACAGACATG  
Naked\_mole TAAAATCTGTTCTTTTTGTCTAAACATTGTTTTTAAAGAACTTGGCCAAACAACACAGGTG  
Guinea-pig ---GATCTGTTCTTTTTGTCTAAA---TGTTTTTAAAGAACTTGTCAAACAACACAAGTG  
Squirrel AAAAAGCTGTTTCTTTTTGTTAAGCATTGTTTTTAGAGAAGTTAGCAAATAATGCA----  
Rabbit -----GACGCGAGCCATAGCTG

Mouse ACTGTAGGTCATAGCCCCCTCCCTTCACACATTATACGCAAATGCTTATCTACTGGGTAT  
Rat GCTGTAGGTCACAGCC----CCATTACATGTTATGCACGAATGCTTCTGTACTTGATAT  
Kangaroo\_Rat GTTCTAAGTCACAGCC----CTCTCTGAACATTCTGCTTCAGTGCTTCTGTATTTGGTAT  
Naked\_mole ATTCTAAGTTGTTGCC----ATATTTGCACACTTTACATTGGTGCTTCTGTATTTGATAC  
Guinea-pig ACCCTGAGGTGACTCC----ATATCTGCACAGTTTCCATTGGTGCTTCTGTACTTGATAC  
Squirrel -----GCT----CCATTTGCACAGTCTACATTGGTGTTTCTATACTTGGTAC  
Rabbit GTTCTATGACACAGCC----CCATCTGCTCATCTGCACGGGTGCTTCCATGTTTGATAC

Mouse TTAAAGGAGAAAAGTTACATCTAAACTCACTCCATAATGTATGCTTTTCAGCGTGGGATGC  
Rat TTAAAGAAGAAAAGTTACATCTAAACTCCTCCCGTAATGTATGCTTTTCAGAGTAGGATGC  
Kangaroo\_Rat TTAAAGAAGAAAAGCTATTTCTAGAATACTTCTGGCTTGTATGTTCT-----AGAGTTAC  
Naked\_mole TTAAAGATGAAAAGTACTTCTACATTTTCTTTCTAATGTAAGTATCCAGAGTGGGACCC  
Guinea-pig TTACAGATGGAA----ATGTCCACATTTTTTCTGTAATGTAAGTATCTAGAGTGGAAACCC  
Squirrel TTAAAGAAGGAA----ACTTCTAAAATTTTTTCTGTAATGTATGCTTCCAGAGTGGGATTC  
Rabbit TTAAAGAAGGAGACTTGCATGTGAAATTTTCTGGGATGTGCGCTTCCCGAGTGGGGCAC

Mouse TAAGCAAGTTCTGATTTTGGCAGCTCAGAGTCACGCTAAATGCCGGGAATACAGGTTTCT  
Rat TAATCAGGTTCTGATTTTGGGAAC-----TCATGCTGAATAACAGGAGTACAGGTT---  
Kangaroo\_Rat TATTCATACTGAAATCAAGTCATCTGAGACTCAAGTTGAGTCTCACAAGCAC-----  
Naked\_mole TTATCAAATTCAAATGG----ATCTCAGAGTCCAGCTGAATCTCAGAAATCCAATGATCT  
Guinea-pig TAATCACATCCACATGG----AACTCAGAGCCATGCAGAATGTTGGAAGGACAGAGACCT  
Squirrel TAATCAAATTCAAATCAAGTCAACTCAGAGTCAAATGAATCTCAGA-----TCT  
Rabbit TACTCACAT-----TCAGGGCCAAGCTCAATCTCAGAAGCACAA---CCT

Mouse TCTCAGAAAGGGCGGGCGGCTTTGGCTAATGTCTGCTGGGGATGTCTTCAAATGCAAAGT  
Rat ----AGAAAGGGCTGGTGGCTTTGGCTAATGTCTGCTGGTGGATGTCATCTAAATACAATGT  
Kangaroo\_Rat ----AGACAAGGCTGGTGGCCTT-----  
Naked\_mole TTCCAGAAAGGGCTGGAGGCT---GCAGCTGTACTTGGGGCTGCCTTTCAAACATTGCAT  
Guinea-pig TTCCAGAAGGGCCAGA-GGTTGTAACAGCCGTGCTGGGCGCTGCCATCCAGACAAGGAAT  
Squirrel TTCCAGAAAGGGCTGGTGGCTTTGGCAGCTGTACTGGGGTGCATCAGCCAAACATGAAAT  
Rabbit TTCAAGCAATGGCTGCTGGCACTGGGGAATGTCTCGGG-----

Mouse GTGTGTCTGACCATGGCCATGGCAGTCTCAAGTTCCCTTTGCCAAGGACTTTGGGGAAATT  
Rat GTGTGTCTGA-----TCATGGCACACTCAAATTCCTTTGCCAAGGACCTTGGGGAAATT  
Kangaroo\_Rat -----  
Naked\_mole GTGTGTCTGG-----TCTTGGCAGTCTCAAAGTTCTTAGCAAAGGATTTTGGGGACATC  
Guinea-pig GCGTGTCTGG-----TCCTGGCAGTCTCAGAGCTCCTTCAAATGACTTGGGGAAAATC

Squirrel GTCTGTCTGG-----CTCTAGCAGTCCCAAACCCCATTACAAAGGGCTCTGGGGAAATC  
Rabbit -----

Mouse CTTCCTCAGGAACTCACATAGCGGAAGAGCAAGAGAGTCCAAATAGTGCTTAAACCT  
Rat CTTCCTCAGGAAAGTCACAGGGAAGGAAGAACAAGAGAGTCCAAATAGCGCTTAAACCT  
Kangaroo\_Rat -----TCAATACAACCACAAATAACCTGGAAATCT  
Naked\_mole CCTCCCCAGAGATTTCA---AGAAGCAAGACGGAAAGAGTCAAGTAAAGATACAAATTT  
Guinea-pig CTTCCCCAGCAGTTTCA----AGGAGGAAACTGAAAGAGTCAAGCATAAGAAATAAATTT  
Squirrel CCTCCCCAGGTATGTCCAGAGAAGGAAGAATAAGAGAGTCCATAGAACATTTAAATTT  
Rabbit -----GAACTACAGAGTCCAAATAAAAATTAATTC

Mouse GGGGTCTATACCTTTTTAACTCTTCAAACAGACAACAGCAGTAAAAAGAGCTCTGCTGCCA  
Rat GGGGTCTATACCTTTTTAAGTTTTCAAAAAGACAACAGCAGTAAAGAAGAGCGTTGTTCCCA  
Kangaroo\_Rat AAGACTGACAC----TACACTTTTTAAGGACACAGCAATGGCCATAAGATCCTTGTTCCCTA  
Naked\_mole AAGATT-----TGAGTTTTCAAGAAGACAGAAACTGCCAAAAGAGCTTTGTTCCCTA  
Guinea-pig AAAATTTAC-----TTAGTTTTCAAGAAGACTGAAATAGCCCAAAGAGCTTTGTTCCCTA  
Squirrel AAGTTTTACACTTTTTAAGTTTTCAAGAAGACAGCAACAACCAAAGAGCTTTATTCTGA  
Rabbit AAGACTTACACTTTTTTTAGATTTCCAGAAGACAGCAGCAGCCAAAAG-GCTTTGTTCCCTG

Mouse GTCTTCAGAGTCTTAACTGAGTTGGAGGCGAACTATTGTGAAGTATAATGTAGTTAGTGA  
Rat GTCTTCTAACTCTTCACCGATTCCGGAAGCAAACACTACTGTGAAGTATAAAGCAGTTAGTGA  
Kangaroo\_Rat GTCA---AAATCATGACTGGTCATGAAGCAAATTTGTTATAAACCATAAACTAGTTATTGG  
Naked\_mole GTCT---AAATTTTGATTGATTAGGAAGCAAACACTATTGTAAATCACAAATCAATTAATA-  
Guinea-pig CTCT---AAATTTAGACTGATTAAGAAGCAAACCTTTATAAATCATAAGTGAATTAACA-  
Squirrel GTCC---AAATTTTGATTGA-TAGATAGCCAACCATTTGTAAACCACAAACCAATTATTAA  
Rabbit GTCT---ACATTTTGACTGCTTAGGACACAAAAGACTGCAAACCATAATGTGATCATTAA

Mouse CTCTGAAGTTAGTCCACAGAAAGCCATTCTTTTTAAATGGACCTACACAACAATTGCCCC  
Rat CTCTGAAGTCACTCTACAGGAAGCCA---TTTTTAAATGGACCCACACGA---TTGGCGC  
Kangaroo\_Rat CCCTG-----ATGGACTCCCATAATCATTTTCTT  
Naked\_mole ---TGAAGTTAATATATTG-----TATTTTATATAAATTGACCTACATAATCATTTCCAT  
Guinea-pig ---GGAAGTTAACATAGAG-----TATTTTATATAAATTGACCTACATAATCATTTCCAT  
Squirrel CTTTGAAGTTAATATACAG-----TTCTTTATATTAATTGACCTACACAACCTGTTTACAT  
Rabbit GGTGACGGCACCATCCAG-----TACTTTCTGTCCAGAGACTACAGCATC-TCAGCAT

Mouse GCACACAAACTGCACATGCAATATTCAAAGCCACTGCTAGGTGCGTTGCTGAGTGCAGAG  
Rat GCACACAAACTGAACATGCACTATTCAATGCCACTGCTAGGTGCGTCGCTCAGTGCAG--  
Kangaroo\_Rat GTGC-CTGAGTGTGTGTGACTCTCTGACAAACCTCTAGTGGTGTGACTGTGTGGAT  
Naked\_mole TTTCACAAAATATGTGTGCAACATTCAGAGATAACCGCTAGGTGTGTGGCTGTGTACAGAT  
Guinea-pig GTGCACAAAATACGTGTGTAGCATTTCAGAGATACTGGTAGGCGTG-----  
Squirrel GTGCACAAAATGCATGTGC-TCATTCAGAGCTACTGTTAGGTATGTGGTAGTGTACAGA-  
Rabbit GTGCACAAAATACACATGCAGTGCTCAGAGATAACAGCGAGCTGGGTGGCTGTGCACAG--

Mouse AGCTGTGCTCCCAGAACCATCAAGTCAACACGCCAGCTGCTCAGCATTATTTACAATATA  
Rat AGCTGTGCTCCCAGAACCCTCGAGTCAACCGCGCCAGCTGTTTCAGCATTAGTTACAATATA  
Kangaroo\_Rat ACCTACACACACACAACCACCAAGCCAATAGACCAGCCACTCAGCAGTATTTACAATGTA  
Naked\_mole ACATACACACATAACAACCACGAAGTCAACACACCAGCTGTTCAACATTATTTACAATATA  
Guinea-pig -----GCCGTGAAGTCAATACCCAACCTGTTCAACATTATTTATAATACA  
Squirrel -----TACACACACAACCCTCAAGTCAACACACCAGCTGTTCCGCATTATTTACAATATA  
Rabbit -----CCCCAGCCCCGAGTCAACACGCCAGCTGTTCCGTGTTATTTACAATGCA

Mouse TTGGCTTCACCACTGACCTAAAGAGCTGAAGAAAATAACAGGCCATATTTTCAGCTTGGT  
Rat TTGGCTTCACCACTGACCTAAAGAGCTGAGGAAAATAACAGGCCATATTTTCAGCTTGGT  
Kangaroo\_Rat CTGGCATCTCTGCTGACCTCAAGAGTTGAAGGAAAATAACAGGCCGATATTTTCAGCTGAGT  
Naked\_mole TTGGCATCGCTGTTGACCTAAAGAGCTGGAGAAAATAACAGGCCATATTTTCAGCTTAGT  
Guinea-pig TTGGCATCACTGTTGACCTAAAGAGCTGGAGAAAATAACAGGCCATATTTTCAGTTTAGT  
Squirrel TTGGCATCACTGCTGACCTAAAGAGCTGAAGAAAATAACAGGCCATATTTTCAGCTTAGT  
Rabbit CTGGCATCACTGCTGACCTAAAGCGCGGAAGAAAATAACAAGCCATATTTTCAGCTTAGT

Mouse AAAAGCCTGCAGTGGGGAGCCCTTTCACAACAATTACAAGCATTGCTCGGAATGCATTT  
Rat AAAAGCCTGCAGTGGGGAGCCC-TTCAGAACAATTACAAGCATTGCTCGGAATGCATTT  
Kangaroo\_Rat AAAAGCCTGCAATAGGGAGCCCTTTCGAACAATTACAAGCATTGCTGGAAATACATTT  
Naked\_mole AAAATCCTGCAGTAGGGAGCCCTTACGAACAATTACAAGTATTTGCTGGAAATACATTT  
Guinea-pig AAAACCCCTGCAGTAGGGAGCCCTTATGAACAATTACAAGTATTTGCTGGAAATACATTC  
Squirrel AAAATCCTGCAGTAGGGAGCCCTTATGAACAATTACAAGCATTGCTGGAAATACATTT  
Rabbit CAAACCCCTGCAAGAGGGAGCCCTTCTGACCAATTACAAGCGTTTGGCTGGAAATACATTG

Mouse GCTGATTTAACAAACTGGAGAGGACAAATGTTTAACATGCTGTCTGAGGCTGTTTCAGTC  
Rat GCTGATTTAACAAACTGGAGAGGACAAATGTTTAACATGCTGTCTGAGGACGTTTCAGTC  
Kangaroo\_Rat GCTGATTTAACAAACTGGGTAGGACAAATGTTTAACATGCTGTCTGATAATGATGTTTCAGAT  
Naked\_mole GCTGATTTAACACACTGGGTAGAACAAATGTTTAACATGCTGTCTGATAATGATGTTTCAGAT  
Guinea-pig ACTGATTTAAC-AACTGGGTAGGACAAATGTTTAACATGCTGTCTGATAATGATGTTTCAGAT  
Squirrel GCTGATTTAACAAACTGGGTAGGACAAATGTTTAACATGCTGTCTGATAATGATGTTTCAGAT  
Rabbit GCTGATTTAACAAACTGGCTGGGACAAATGTTTAACATGCTGTCTGATAATGATGTTTCAAAT

Mouse GCTTTTCTTGGTATCCGTTGATCTGAGATAATGTGTTCTTGCCCAATCATGCTACAAAGA  
Rat GCTTCTCTTGGTATCCGTTGATCTGCGATAATGTGTTCTTGCCCAATCATGCTACAAAGA  
Kangaroo\_Rat GCTTTTCTTGGTATTCGTTGATCTGAGATAATGCGCTCTTGCCCAATCATGCTACAAAGA  
Naked\_mole GCTTTTCTTAGTATTCGTTGATCTGAGATAATGCGTTCTTGCCCAATCATGCTACAAAGA  
Guinea-pig GCTTTTCTTAGGATTCGTTGATCTGAGATAATGTGTTCTTGCCCAATCATGCTACAAAGA  
Squirrel GCTTTTCTTAGCATTCGTTGATCTGAGATAATGCGTTCTTGCCCAATCATGCTACAAAGA  
Rabbit GCTTTTCTCAGTATTCCTTGATCTGAGATAATGCGTCCCCGCCCAATCACGCTACAAAGC

Mouse AGCAGCGGAAATAAATAAATAAATAGATGTAATGCGATGCGTTCCCACAATAGCTGAGCT  
Rat AGCAGTGAAATAAATAAATAAATAGATGTAATGCGATGCGTTCCCACAATAGCTGAGCT  
Kangaroo\_Rat AGCAGCAGAAATAAATAAATAAATAGCTGTAATGTGATGCGCTCTCACAATAGCAGAGCT  
Naked\_mole AGCAGTGAAATAAATAAATAAATAGATGTAATGTGATGCACTCTCACAATAGCAGAGCT  
Guinea-pig AGCAGCGGAAATAAATAAATAAATAGATGTAATGTGATGCGCTCTCACAATAGCAGAGCT  
Squirrel AGCAGTGAAATAAATAAATAAATAGATGTAATGTGATGCGCTCTCACAATAGCAGGGCT  
Rabbit CGCGGCGGAAATAAATAAATAAATACATGTAATGTGATGCGCTCTCACAATAGCAGAGCC

Mouse GCTGACGGCCCTGACAGATGGAAAGAAAAAAAAAAAAAAAAAGTCAATATGATGTCTGAGAC  
Rat GCTGACTGCCCTGACAGATGG-----AAAAAAAAAAGTCAATATGATGTCTGAGGC  
Kangaroo\_Rat GCTGACTGGCCCTGACAGATGG-----GAGGGGGGAAAAGTCAATATGATGTCTGAGAC  
Naked\_mole GCTGACTGCCCTGACAGATGG-----GGAAAAAAGTCAATATGATGTCTGAGAC  
Guinea-pig GCTGACTGCCCTGACAGATGG-----AAAAAAAAAAGTCAATATGATGTCTGAGAC  
Squirrel GCTGACTGCCCTGACAGATGGAA--AAAAAAAAAAAAAAAAAGTCAATATGATGTCTGAGAC  
Rabbit GCTGACTGCCCTGACAGATGG-----AAAAAAAAAAAAAAAAAGTCAATATGATGTCTGAGAC

Mouse AGCCCAGGCTCGGCACTGCAGAATAAATTACATGATTGCGCGAATGCTTGGGCCTCGCTC  
Rat AGCCCAGGCTCCGCACCGCAGAATAAATTACATGATTGCGCGAATGCTTGGGCCTCGCTC  
Kangaroo\_Rat AAGCCGGGGTCAGCACTGCAGAATAAATTACATGATTGCGTGAATGCCGCGGCTTCGCTC  
Naked\_mole AGCCCAGGTTTGGCATTGCAGAATAAATTACATGATTGCGTGAATGCCGCGGCTTCGCTC

Guinea-pig AGCCCAGGCTTGGCATTGCAGAATAAATTACACGATTTCGCTGAATGCTGGGGCTTCGCTC  
Squirrel AGCCCAGGCTTGGCACTGCAGAATAAATTACATGATTTCGCTGAATGCCTGGGGCTTCGCTC  
Rabbit AGGCCAGGCTCAGCACTGCAGAATAAATTACATGATTCACTGAATGCCTGGGGCTTCGCTC

Mouse AGACATTCAAAAAAAAAAAAAAAAAATTGGAAAGATAAAAAGCTTGCATTGGCTTCAGATGATAT  
Rat AGACATTCAAAAAAAAAAAAAAAAAATTGGAAAGATAAAAAGCTTGCATTGGCTTCAGATGATAT  
Kangaroo\_Rat AGACATAC-----AAAAAATTGGAAAGATAAAAAGCTTGCATTGGTTTCAGATGATAT  
Naked\_mole AGACGTAC-----ACAAAATTGGAAAGATAAAAAGCTTGGACTGGCTTCAGATGATAT  
Guinea-pig AGACATAC-----AAAAAATTGGAGAGATAAAAAGCTTGCATTGGCTTCAGATGATAT  
Squirrel AGACATAC-----AAAAAATTGGAAAGATAAAAAGCTTGCATTGGCTTCAGATGATAT  
Rabbit AGACGTAC-----AAAAAATTGGAAAGATAAAAAGCTTGCATTGGCTTCAGATGATAT

Mouse TTACTGCTTGATGGATTTACTAGCAGCACCAGTACAGTCGACTGTATTGAATTATTGGC  
Rat TTACTGCTTGATGGATTTACTAGCAGCCCCAGTACAGTCGACTGTATTGAATTATTGGC  
Kangaroo\_Rat TTACTGCTTGATGGATTCACTAGCAGCCCCAGTCCGGTCGACTGTATTGAATTATTGGC  
Naked\_mole TTACTGCTTGATGGTTTACTAGCAGCCCCAGTACAGCCGTGTTGTATTGAATTATTGGC  
Guinea-pig TTACTGCTTGATGGATTTACTAGCAGCCCCAGTGCAGTCCTACTGTATTGAATTATTGGC  
Squirrel TTACTGCTTGATGGATTTACTAGCAGCCCCAGTACAGTCGACTGTATTGAATTATTGGC  
Rabbit TTACTGCTTGATGGATTCACTAGCAGCCCCGTACAGCCGTACTGTATTGAATTATTGGC

Mouse CTCTATTTAGCTGTGTGTCTGTCTGGCGCTCGAGTGTCCATTTAAGCATAAGTGAGCTGGA  
Rat CTCTATTTAGCTGTGTGTCTCGTCTGGCGCTCGAGTGTCCATTTAAGCATAAGTGAGCTGGA  
Kangaroo\_Rat CTCTATTTAGCTGTGTGTCTCGTCTGAAGCTTGAGTGTCCGTTTAAGCCTAAGTGAGCTGGA  
Naked\_mole CTCTATTTAGCTGTGTGTCTCGTCTGGAGCTGGAGTGTCCATTTAAGGATAAGTGAGTTGGA  
Guinea-pig CTCTATTTAGCTGTGTGTCTGTCTGGAGCTCGAGTGTCCATTTAAGCATAAGTGAGTTGGA  
Squirrel CTCTATTTAGCTGTGTGTCTCGTCTGGAGCTTGAGTGTCCATTTAAGCATAAGTGAGCTGGA  
Rabbit CCCTATTTAGCTGTGTGTCTGTCTGGAGCTTGAGTGTCCATTTAAGCGTAAGTGAGCTGGA

Mouse GACCTGCCAAGCCCCTTTGAGGCTCCGGGTGCAGAGAAAGACGCAGGCTAATGGCCACCA  
Rat GGCCCTGCCAAGCCCCGTGTGAGGCTCTGGGTGCAGAGAAAGACGCAAGCTAATGACCACCA  
Kangaroo\_Rat GGCTTGCCAAACCTCTCAGAGACTCTGGGTGCACAGAAAGACACGAGCTAATGGCCGCCA  
Naked\_mole GGCTGGCCAAGCCTCTCGGAGGCTCTGGGTGCAGAGACAGGAGTGAGCTGATGGCCCCCA  
Guinea-pig GGCTGGCCAAGCCTCTTGAGGCTCTGGGTACAGAGAGAGACGTGAGCTAATGGCCACCA  
Squirrel GGCCCGCCAAGCCTCTCCGAGGCTCTGGGTACAGAGAAAGACAAGAGCTAATGGCCACCA  
Rabbit GGCTGGCCAAGGCTCTCGGCGGCTCGGGTCCAGAGAAGCG-GCGAGCTCACGGCCACCA

Mouse GCTTGAATAACAGGGAGTGTAAGGACATTGGGGGAGGCAACAAAGCCCAGCTACAAAGTA  
Rat GCTTGAATAACAGGGAGTGTAAGGACATTGGGGGAGGCAATGAAGCCCATCTACAAAGTA  
Kangaroo\_Rat GCTTGAATAACAGGGA-TCAGGGGACACCGGGGAGGCAGGAAAGGCCAGCTACACAGTC  
Naked\_mole GCTGGAATAACAGGGAGCACGAGGACACTGGGG--AGCTACCAGGCTCAGCTACAAAGTA  
Guinea-pig GCTTGAATAACAGGGAGCTTGAGGACATCGGGGAGGCTACAAGGCTCAGCTACAAAGTA  
Squirrel GCTTGAATAACAGGGTGTCTGAGGACATTGGGGGAGGCAACAAAGCCCAGCTACAAAGTA  
Rabbit GCTTGACTACATGGGAGTTGGAGGACACTGGTGGAGGCGAC-GCCCCAGCTCCAGGGGA

Mouse CTTGCTTATCAATATTAATGCCAAAATAAATATTAATGGAGGCTGCCCGGCATAGC  
Rat CTTGCTTATCAATATTAATGCCAAAATAAATATTAATGACGGCTACCCGGCAGAGC  
Kangaroo\_Rat CTTTCTTATCAATATTAATGCCAAGATAAATATTAATGCAGCCTGCCTG-CATACC  
Naked\_mole CTTTCTTATCAATATTAATG-CAAAATAAATATTAATGGAGGCTGCCTGGCATAACC  
Guinea-pig CTTGCTTATCAATATTAATGCCAAGATAAATATTAATGCAGGCTGCCTGGCATAACC  
Squirrel CTTTCTTATCAATATTAATGCCAAAATAAATATTAATGGAGGCTGCCCGGCATACC  
Rabbit CTTTCTTATCAATATTAATGCCAAAATAAATATTAATGGAGGCTGCCCTGTGCACC



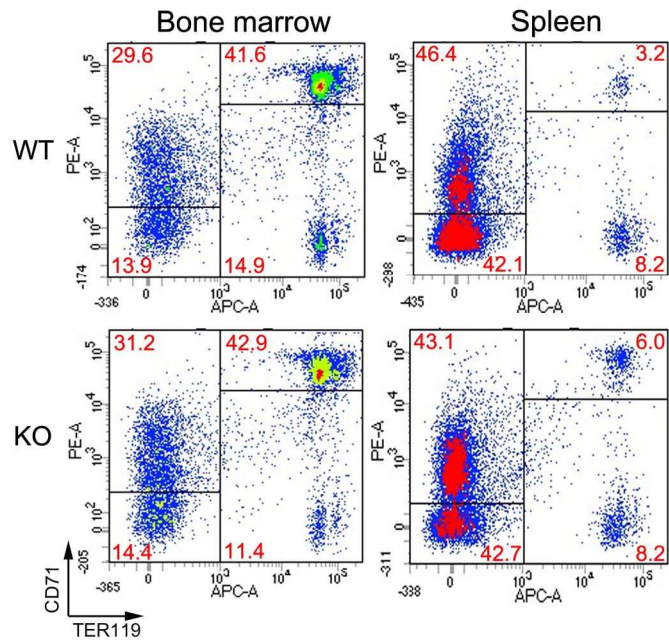

**Supplementary Figure S2.** Flow cytometric analysis of erythropoiesis in adult bone marrow and in the spleen. Cells were labelled with APC-conjugated anti-mouse TER119 and PE-conjugated CD71. Each quadrant represents distinct stages of development. Note the lack of difference between wild type and homozygous mutant mice (n=6).

A

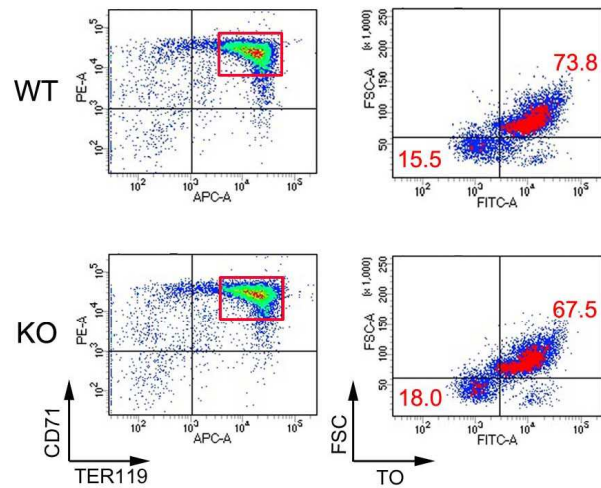

B

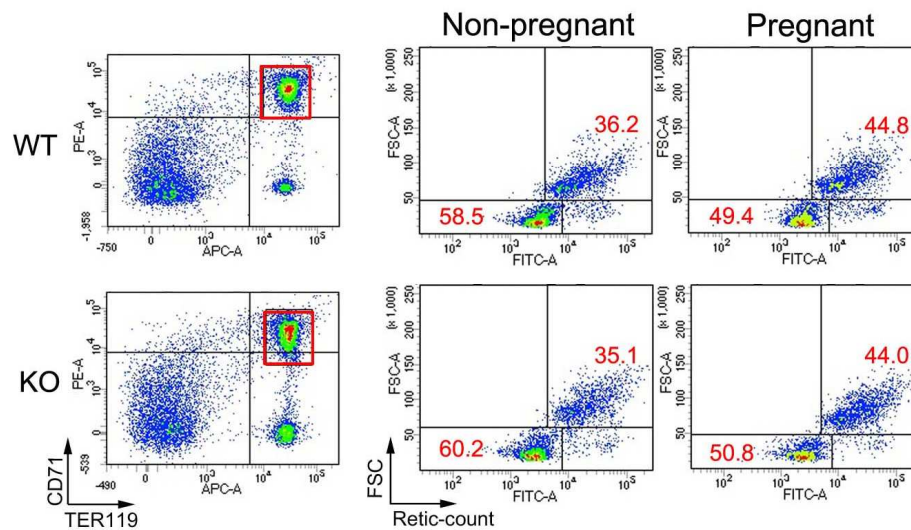

**Supplementary Figure S3.** Flow cytometric analysis of erythroblast maturation. CD71<sup>+</sup> TER119<sup>+</sup> erythroblasts were isolated and stained with TO or Retic Count. FSC<sup>high</sup> and TO<sup>high</sup>/Retic Count<sup>high</sup> cells represent uncondensed cells prior to enucleation, and FSC<sup>low</sup> and TO<sup>low</sup>/Retic Count<sup>low</sup> cells represent condensed and enucleated cells. Fetal liver cells at E12.5 (A, n=3) and bone marrow cells from non-pregnant and pregnant adults were examined (B, non-pregnant WT and KO, n=6 & pregnant WT, n=12, pregnant KO, n=7). Note the similar proportions of the two populations in wild type and homozygous mutant mice.

| Gene                            | log2 fold | in-situ hybridization |                                                     |                |                |
|---------------------------------|-----------|-----------------------|-----------------------------------------------------|----------------|----------------|
|                                 |           | EST clone ID          | Oligonucleotide primers                             | probe size(kb) | in-situ signal |
| H19                             | -5.85     | 3592592               | –                                                   | 1.1            | o              |
| 2700038G22Rik                   | -1.48     | 635638                | –                                                   | 0.5            | o              |
| Mirg                            | -1.39     | 6430152               | –                                                   | 0.6            | o              |
| Rian                            | -1.44     | 5366080               | –                                                   | 0.5            | o              |
| AI662270                        | -6.83     | 2749177               | –                                                   | 0.5            | x              |
| 2700023E23Rik                   | -2.31     | 464419                | –                                                   | 0.5            | o              |
| AI854517                        | 3.27      | 5686650               | –                                                   | 1.3            | o              |
| 2900079G21Rik                   | 3.38      | 571035                | –                                                   | 1.1            | x              |
| A930011O12Rik                   | 2.30      | 5357993               | –                                                   | 3.8            | o              |
| Miat                            | 1.64      | 4318150               | –                                                   | 0.7            | o              |
| 9430076G02Rik ( <b>Redrum</b> ) | -5.49     | –                     | F: GAATGAGCCTCACTCTACACC, R: ACTTGATGGTTCTGGGAGCAC  | 1              | o              |
| Gm17370                         | 2.05      | –                     | F: GGTGGTGATGGAGTCACTTAG, R: CTCTGTCTGTACTGGACTTGG  | 0.9            | x              |
| 2700033N17Rik                   | 1.38      | –                     | F: AGTCAAAGGCACCCTTGACAG, R: TCTTGGCTCCTGCCTAACTG   | 0.6            | x              |
| Gm17446                         | -2.70     | –                     | F: TCCAGCATACGGTCTACCATTC, R: CCTGCCACTTGGCCCATC    | 1              | x              |
| Gm3764                          | 1.55      | –                     | F: AGAGCAGCGGCCAAGGCTGAG, R: GGTTGCTATGGCAACATAGCG  | 1              | x              |
| Mir1900                         | -4.17     | –                     | F: GCTAAGTATGGGAGCCACGC, R: TCAGTCTCTGCCTTACGGTTC   | 0.9            | x              |
| Gm16869                         | 1.74      | –                     | F: AGAAATGTCCACTGTAGGACAGGG, R: TCCTCGCCATATTTACGTC | 0.5            | x              |
| Gm16707                         | 1.69      | –                     | F: GGATGGGTTAAGTGTCTTAGC, R: ATTGACGGCAGGCAGAGAC    | 1              | x              |
| Gm12063                         | 2.44      | –                     | F: CCTAATTTCCAGGGAAGGTCTG, R: AAGTTTGGAGGGTCGCGTG   | 0.6            | x              |

**Supplementary Table S1.** Candidate lncRNAs with tissue specific expression and functions. Listed are the 19 most highly differentially expressed lncRNAs (see Results). The log<sub>2</sub> fold value for each lncRNA indicates the ratio of expression levels in the telencephalon and whole body. For those with EST clones, ID is given. For those without, oligonucleotide primers used for RT-PCR are listed. Probe sizes and *in situ* results are provided.

**Supplementary Table S2.** Oligonucleotide primers used in generation of the gene targeting vector.

| <b>fragment</b> | <b>Forward primer sequence</b><br><b>Reverse primer sequence</b> |
|-----------------|------------------------------------------------------------------|
| <b>5' arm</b>   | 5' - GCTGTCTGCGAATTGTCC- 3'<br>5' - TCACCTGTGACCAGCAGCTTC- 3'    |
| <b>3' arm</b>   | 5' - TGGCTGGAAATGACTGTGTGA- 3'<br>5' - GTTGCCAAGATGCACAAGAAC- 3' |
| <b>Poly A</b>   | 5' - CGACTGTGCCTTCTAGTTGC- 3'<br>5' - CCATAGAGCCCACCGCATC- 3'    |

**Supplementary Table S3.** Oligonucleotide primers used for generation of the probe for Southern blotting and for PCR genotyping (see Fig.3)

|                            | <b>fragment</b> | <b>primer sequence</b>     |
|----------------------------|-----------------|----------------------------|
| <b>Southern blot probe</b> | <b>Forward</b>  | 5'-TCTCTCACTGAAGCCTCGTT-3' |
|                            | <b>Reverse</b>  | 5'-AGCAGTTGTAAAGGGTGCCT-3' |
| <b>Genotyping</b>          | <b>F1</b>       | 5'-GTGGTCATCTTTGAAGCTG-3'  |
|                            | <b>R1</b>       | 5'-AGTGAGGCTCATTCTTCCCT-3' |
|                            | <b>R2</b>       | 5'-TCTAGGACAAGAGGGCGAGA-3' |
